# Supplementary material for: ScaffComb: A Phenotype‐Based Framework for Drug Combination Virtual Screening in Large‐Scale Chemical Datasets
Source: PubMed Central journal article supplement (PMC8693048; doi:10.1002/advs.202102092), 2021-11-01
Supplement: ADVS-8-2102092-s001.pdf [file ADVS-8-2102092-s001.pdf]

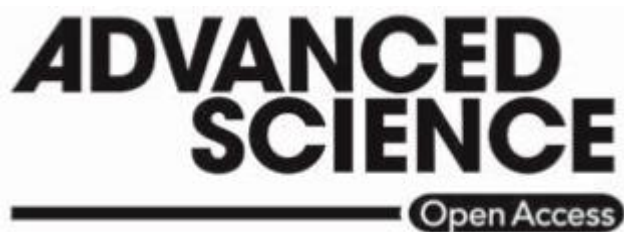

## Supporting Information

for *Adv. Sci.*, DOI: 10.1002/adv.202102092

### ScaffComb: A Phenotype-Based Framework for Drug Combination Virtual Screening in Large-scale Chemical Datasets

*Zhaofeng Ye*<sup>1,2</sup>, *Fengling Chen*<sup>3,4</sup>, *Minglei Shi*<sup>1,2</sup>, *Jiangyang Zeng*<sup>2,5</sup>, *Juntao Gao*<sup>2\*</sup> and *Michael Q. Zhang*<sup>1,2,6\*</sup>

## Supplementary Materials

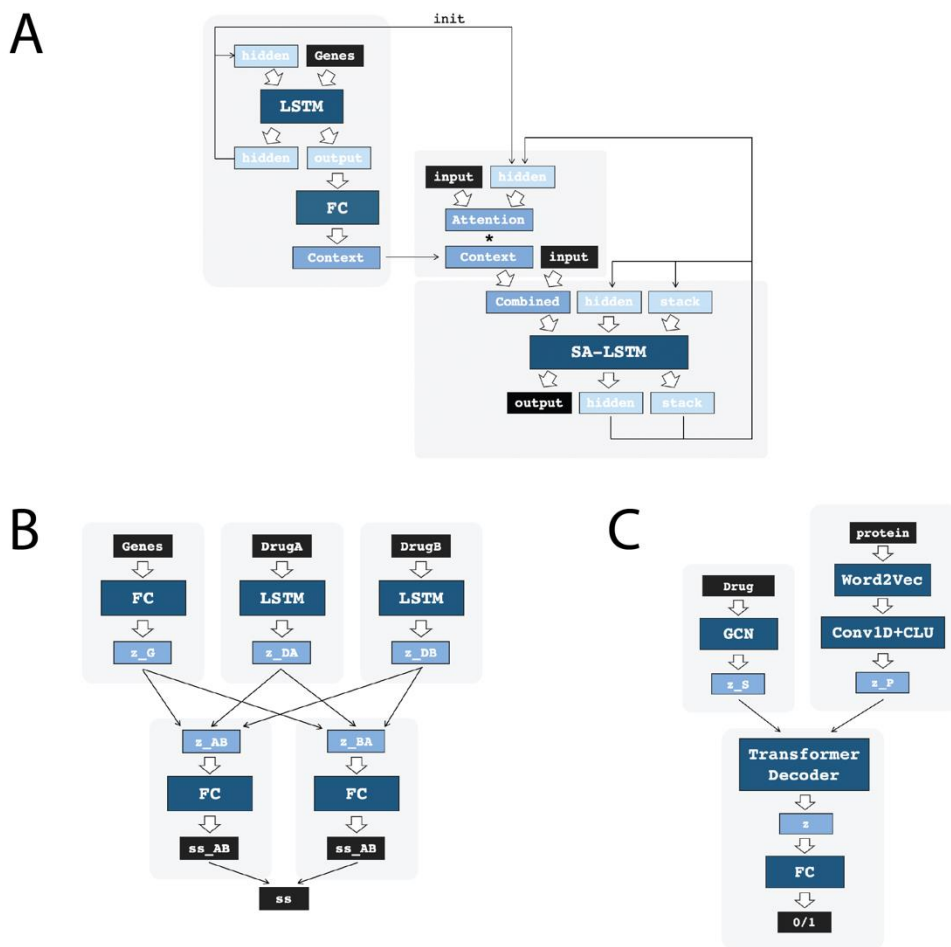

**Figure S1. Structure of modules in ScaffoldComb.** **A.** Gene-scaffold generator, which takes differential gene expression vectors as the input to generate scaffolds. **B.** Drug synergy predictor, which takes the basal expression of cell lines and two drug SMILES as inputs to calculate synergy scores. **C.** Drug-target interaction classifier; TransformerCPI was used in this work. The classifier was trained to predict drug-target interactions. FC: fully connected layers. LSTM: long short-term memory. SA-LSTM: stack-augmented LSTM. GCN: graph convolutional network. GLU: gated linear unit.

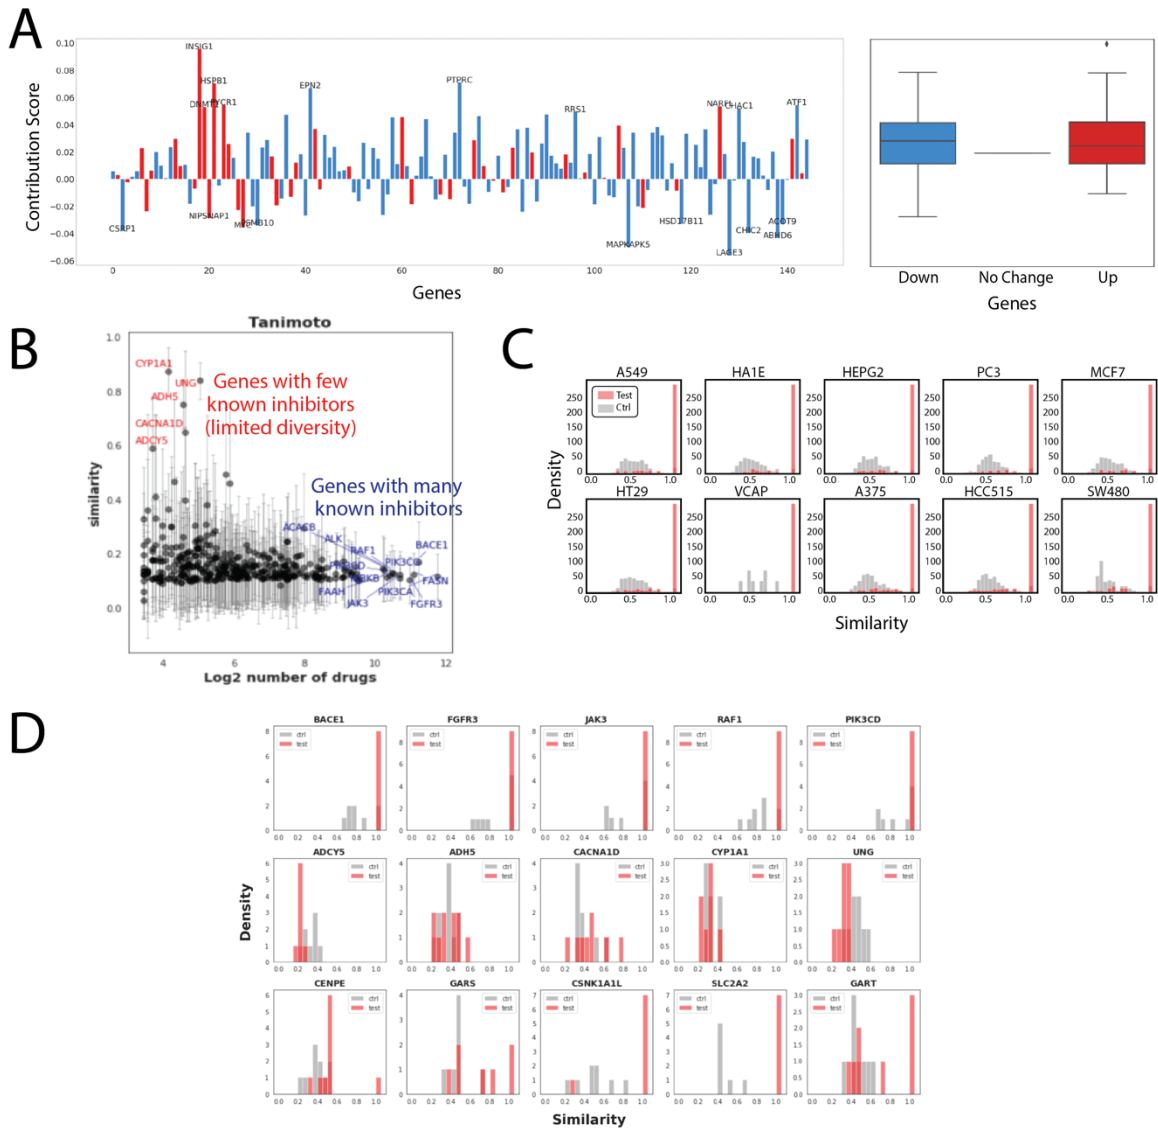

**Figure S2. Performance evaluations for the gene-scaffold generator.** **A.** An example of the contribution of upregulated and downregulated genes in the input gene signatures to the scaffold generation. **B.** Number of inhibitors and similarity of intra-target inhibitor scaffolds. Red represents genes with few inhibitors but high similarity. Blue represents genes with many inhibitors. **C.** Similarity distribution comparison of inhibitor scaffolds to generated scaffolds (red) and random scaffolds (gray) in the different cell lines. **D.** Sampled targets for scaffold generation comparison. Upper panels show blue targets; middle panels show red targets; lower panels show randomly selected black targets

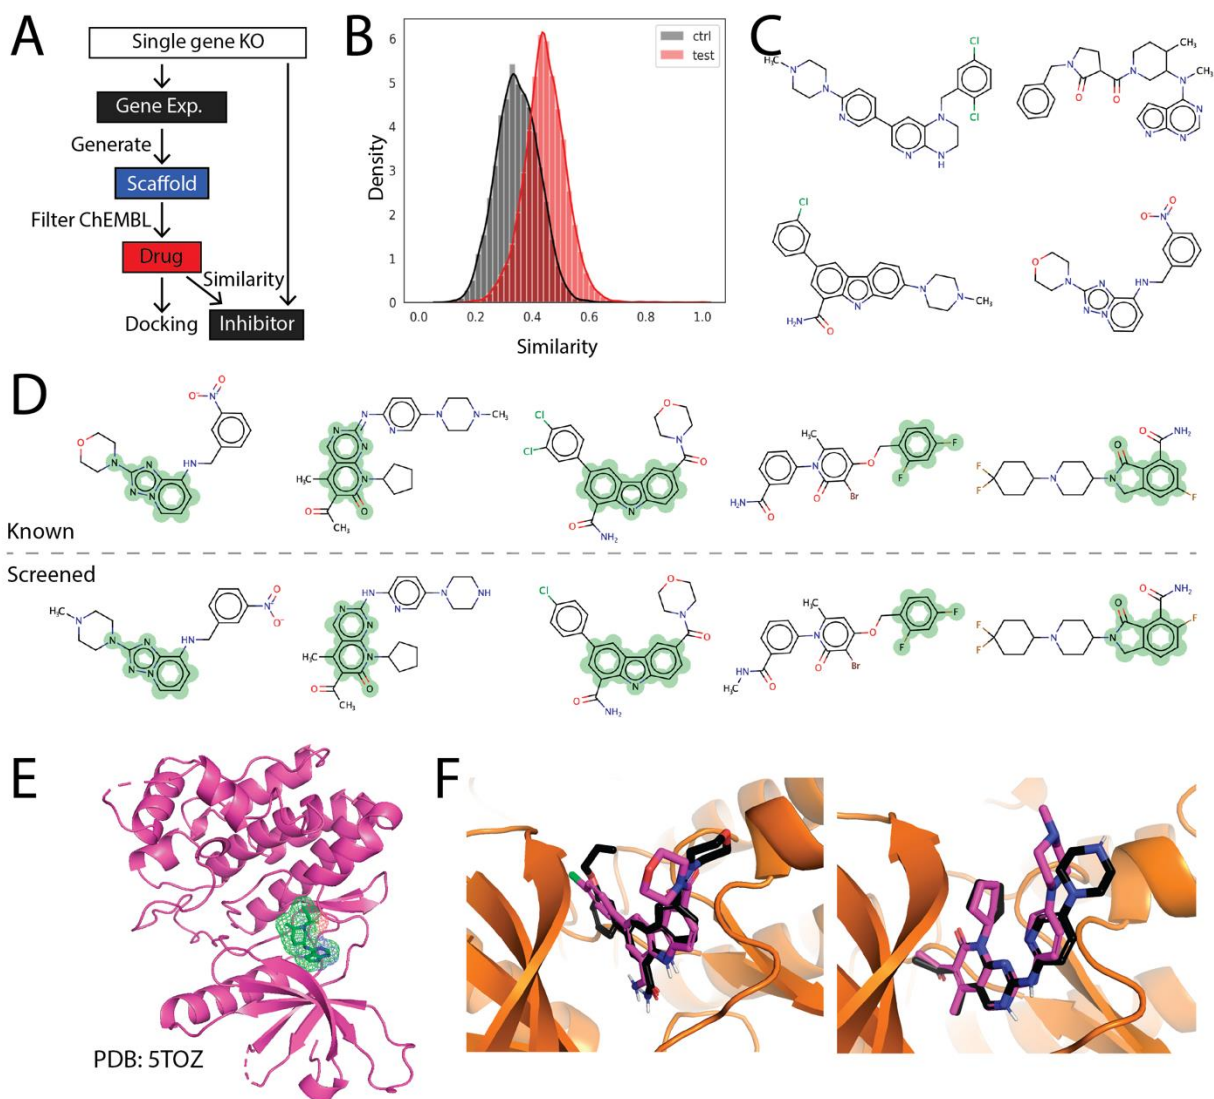

**Figure S3. Screening results based on the JAK3 knockout phenotype in ChEMBL.** **A.** Pipeline for drug screening. **B.** Similarity of known inhibitors to screened drugs (red) and random drugs (black). **C.** Some known inhibitors were screened. **D.** Some compounds with high similarity to known inhibitors were screened. **E.** Crystal structure of the protein kinase domain of JAK3 (PDB ID: 5TOZ). Green meshes show a binding compound. **F.** Some binding poses of screened compounds (red) and known inhibitors (black) to JAK3. Orange represents protein structures.

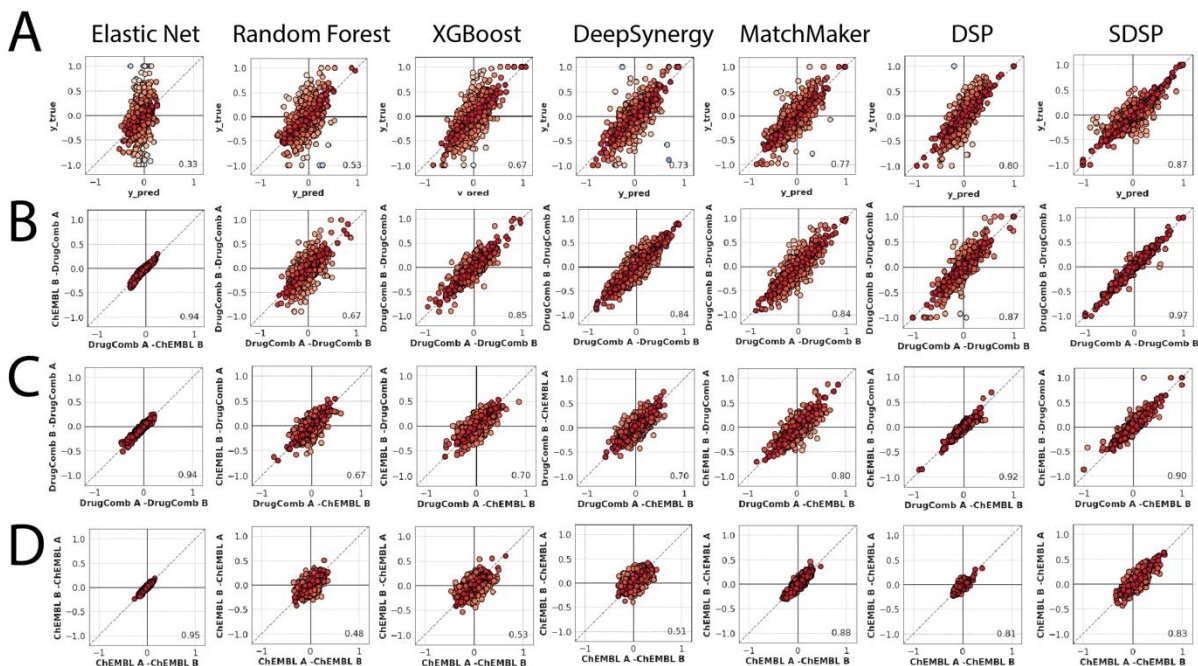

**Figure S4. Performances for different models in regression tasks. A.** Performance on test set. **B–D.** AB-BA correlation of different methods using different sources of compounds. **B.** Two drugs from DrugComb. **C.** One from DrugComb and one drug from ChEMBL. **D.** Two drugs from ChEMBL.

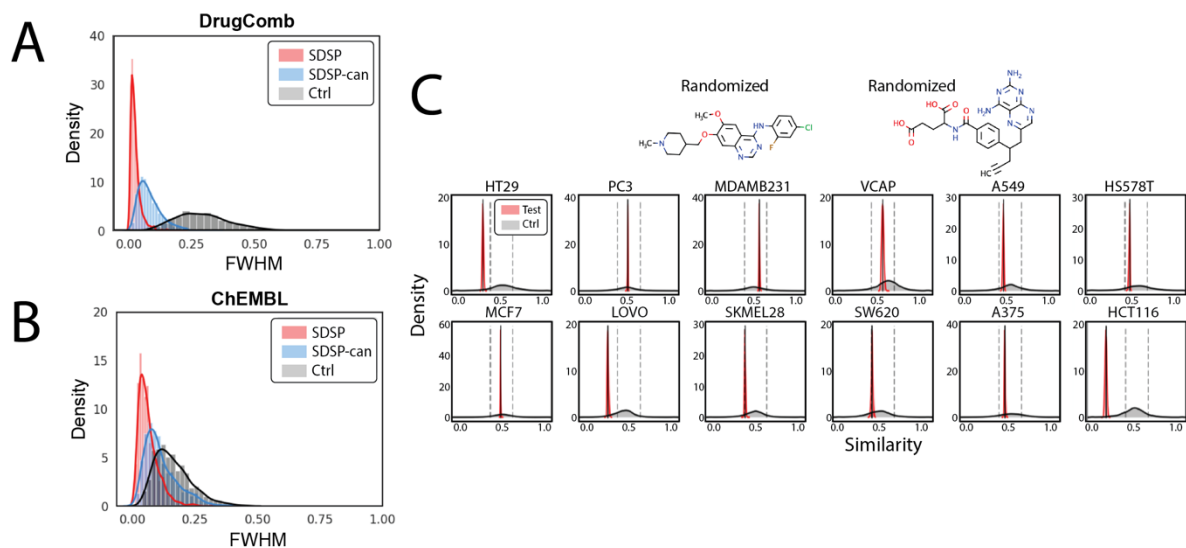

**Figure S5. SMILES-based drug synergy predictor predicts consistent results for different forms of SMILES. A, B.** FWHM distributions of synergy scores using randomized SMILES strings from DrugComb (A) or ChEMBL (B) as inputs. Red represents predictions with SDSP. Blue represents predictions with SDSP-can. Gray represents random control. **C.** An example of the distribution of synergy scores with randomized SMILES strings using SDSP (red) and synergy scores between random controls (gray).

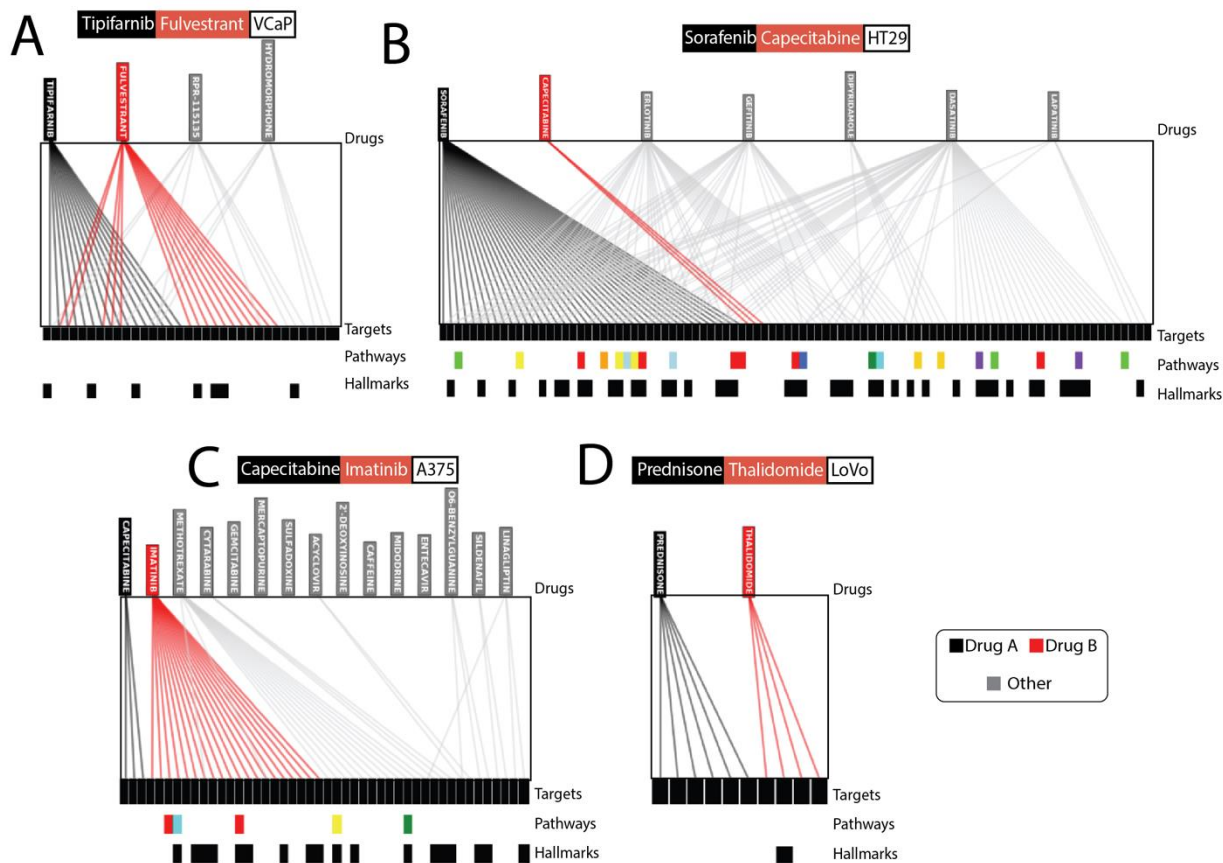

**Figure S6. Diverse combination mechanism in FDA-approved drug combinations.** **A.** Combination of two chemotherapeutic drugs. **B, C.** Combinations of a chemotherapeutic drug and a targeted drug. **D.** Combination of two targeted drugs. Upper boxes show drug combination components. Lower color bars show enriched pathways. Lower black bars shown hallmark genes in cancer.

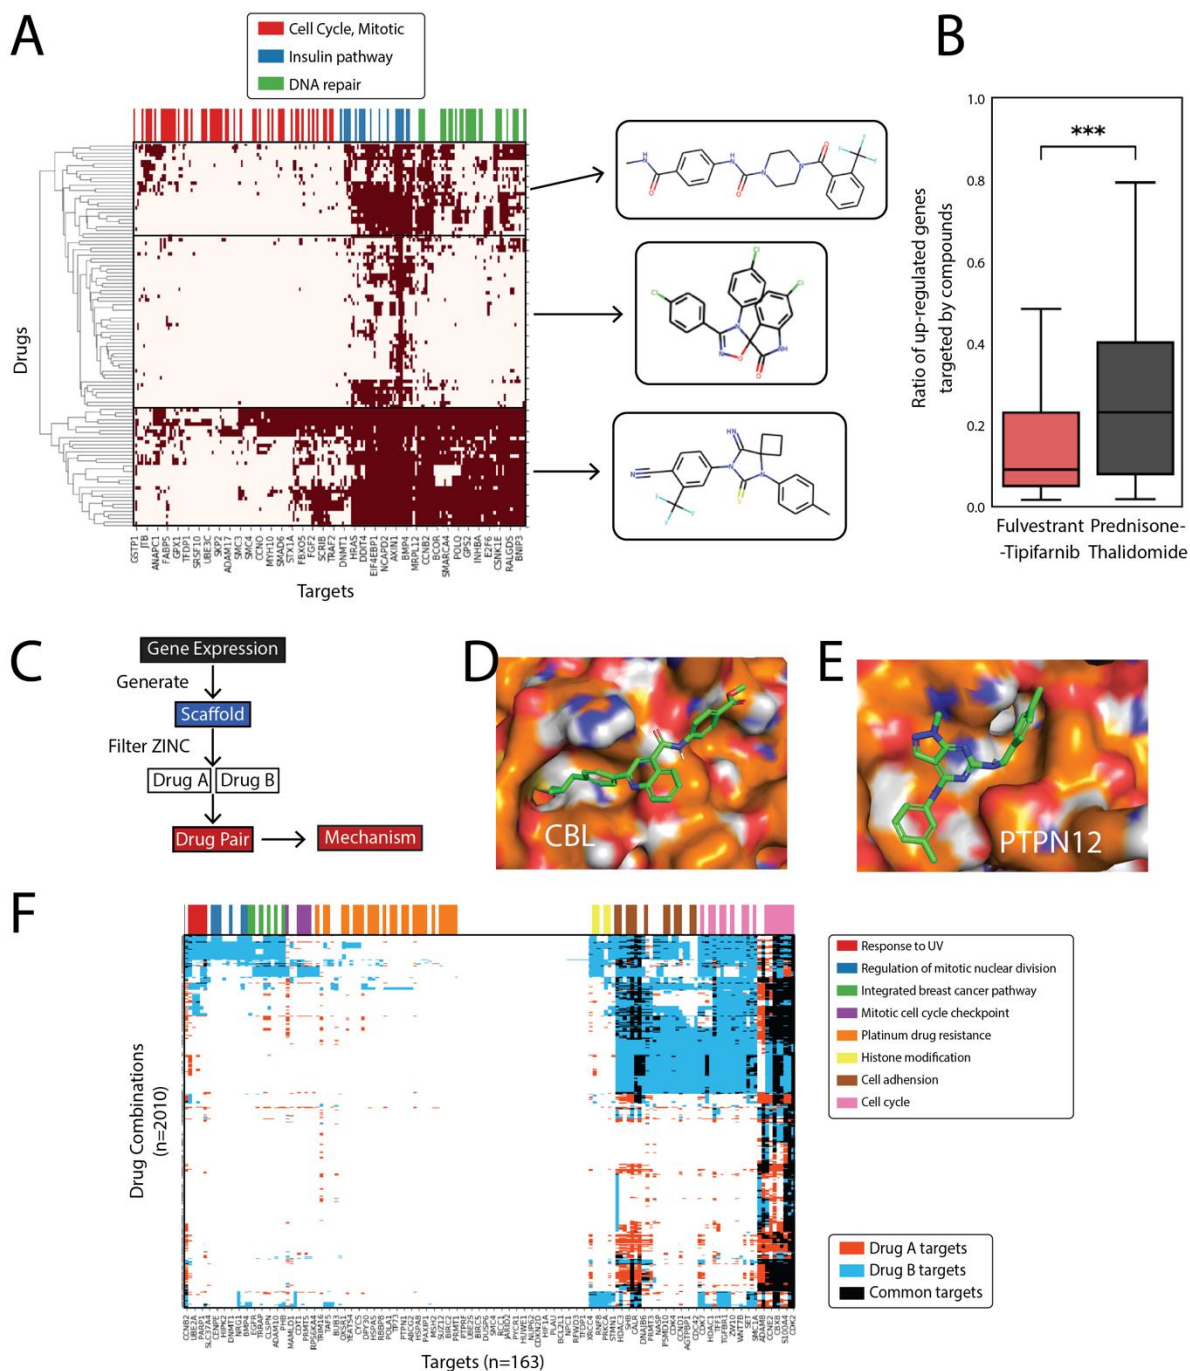

**Figure S7. Drug combination screening of large chemical libraries using ScaffComB.** **A.** Heatmap of screened combined drugs in the prednisone-thalidomide case. Top bars show enriched pathways. Boxes show chemical structures of middle points of the clusters. **B.** Ratio of upregulated genes targeted by screened drugs in the fulvestrant-tipifarnib case (red) and prednisone-thalidomide case (black). \*\*\*



indicates a p-value  $< 0.0001$  **C.** Pipeline for screening drug combinations from some phenotypes. **D, E.** Binding poses of some screened compounds to CBL and PTPN12 that are dissimilar to known inhibitors. Green represents chemical structures. Orange represents protein structures. **F.** Heatmap of combination mechanisms of screened drug combinations with high synergy scores in the MDA-MB-231 cell line. Red represents targets for drug A; blue represents targets of drug B; black represents common targets. Top color bar shows the enriched pathways.

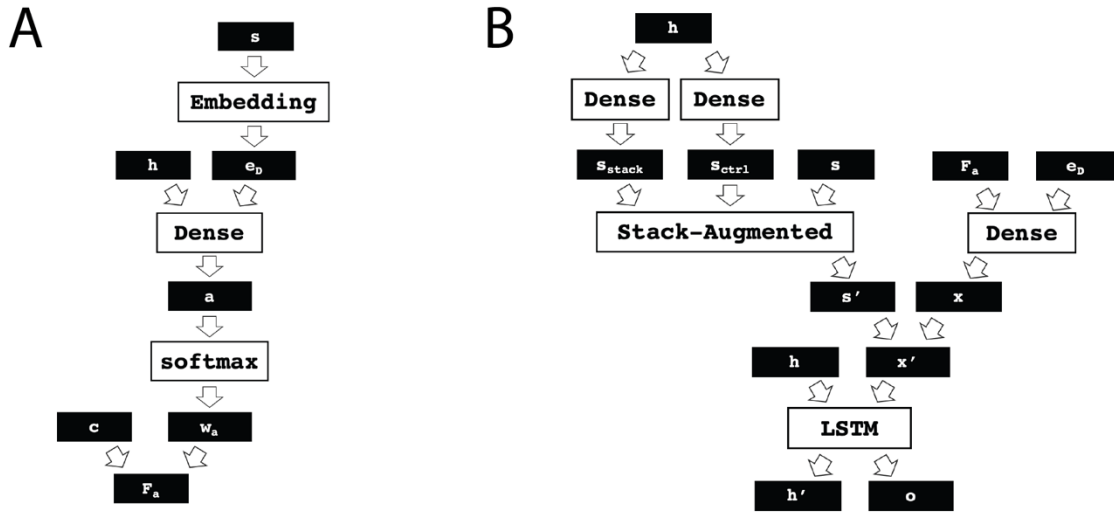

**Figure S8. Network details of GSG attention module and SA-LSTM module. A.** Attention module. **B.** SA-LSTM module. Black boxes indicate input, intermediate, or output vectors. White boxes indicate neural networks.

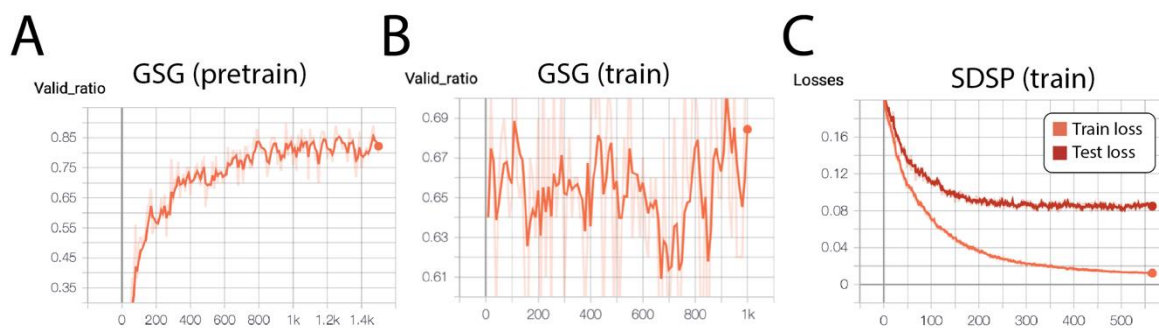

**Figure S9. Training processes of GSG and SDSP.** **A, B.** Validity ratio changes during pre-training and training phases for GSG. **A.** GSG was pre-trained with ChEMBL scaffolds. **B.** GSG was then trained with L1000 scaffolds along with DEG vectors. **C.** Train and test loss changes during SDSP training.

**Table S1 Synergy score prediction performance across different methods**

| Method <sup>a</sup>  | Regression                        |                                   | Classification <sup>b</sup>       |                                   | AB-BA correlation <sup>c</sup>    |                                   |                                   |
|----------------------|-----------------------------------|-----------------------------------|-----------------------------------|-----------------------------------|-----------------------------------|-----------------------------------|-----------------------------------|
|                      | Spearman $\rho$                   | Pearson r                         | AUC                               | AUPRC                             | DrugComb-DrugComb                 | DrugComb-ChEMBL                   | ChEMBL-ChEMBL                     |
| <b>Elastic Net</b>   | 0.33 $\pm$ 0.01                   | 0.34 $\pm$ 0.01                   | 0.66 $\pm$ 0.02                   | 0.28 $\pm$ 0.04                   | 0.94 $\pm$ 0.01                   | <b>0.94 <math>\pm</math> 0.01</b> | <b>0.96 <math>\pm</math> 0.02</b> |
| <b>Random Forest</b> | 0.52 $\pm$ 0.02                   | 0.58 $\pm$ 0.02                   | 0.75 $\pm$ 0.01                   | 0.47 $\pm$ 0.03                   | 0.67 $\pm$ 0.01                   | 0.67 $\pm$ 0.02                   | 0.47 $\pm$ 0.03                   |
| <b>XGBoost</b>       | 0.61 $\pm$ 0.02                   | 0.67 $\pm$ 0.01                   | 0.80 $\pm$ 0.02                   | 0.51 $\pm$ 0.04                   | 0.85 $\pm$ 0.02                   | 0.69 $\pm$ 0.02                   | 0.50 $\pm$ 0.06                   |
| <b>DeepSynergy</b>   | 0.68 $\pm$ 0.05                   | 0.74 $\pm$ 0.06                   | 0.85 $\pm$ 0.01                   | 0.64 $\pm$ 0.03                   | 0.85 $\pm$ 0.01                   | 0.70 $\pm$ 0.01                   | 0.50 $\pm$ 0.02                   |
| <b>MatchMaker</b>    | 0.72 $\pm$ 0.04                   | 0.77 $\pm$ 0.02                   | 0.86 $\pm$ 0.04                   | 0.68 $\pm$ 0.04                   | 0.84 $\pm$ 0.01                   | 0.80 $\pm$ 0.02                   | 0.88 $\pm$ 0.01                   |
| <b>DSP</b>           | 0.76 $\pm$ 0.04                   | 0.80 $\pm$ 0.02                   | 0.88 $\pm$ 0.01                   | 0.71 $\pm$ 0.03                   | 0.87 $\pm$ 0.01                   | 0.92 $\pm$ 0.01                   | 0.81 $\pm$ 0.01                   |
| <b>Augmented DSP</b> | <b>0.80 <math>\pm</math> 0.04</b> | <b>0.85 <math>\pm</math> 0.02</b> | <b>0.90 <math>\pm</math> 0.01</b> | <b>0.80 <math>\pm</math> 0.04</b> | <b>0.97 <math>\pm</math> 0.01</b> | 0.90 $\pm$ 0.01                   | 0.82 $\pm$ 0.01                   |

<sup>a</sup> Input features were gene expression signatures as cell line features and ECFP4 fingerprints as drug features for all methods except SDSP, which used randomized SMILES strings as drug features.

<sup>b</sup> Samples with Bliss scores  $> 5$  are considered positive, whereas values  $< -5$  are considered negative. AUC: area under the ROC curve; AUPRC: area under the precision-recall curve.

<sup>c</sup> Mean and standard deviation of 1,000 combinations in different cell lines.

**Table S2 Combined drug screening in the ChEMBL database**

| <b>Combination <sup>a</sup></b> | <b>Phenotype</b> | <b>No. scaffolds for screening</b> | <b>No. screened drugs <sup>b</sup></b> | <b>No. positive drugs <sup>c</sup></b> |
|---------------------------------|------------------|------------------------------------|----------------------------------------|----------------------------------------|
| Prednisone-<br>Thalidomide-LoVo | Thalidomide      | 8                                  | 90,870                                 | 602                                    |
| Sunitinib-<br>Capecitabine-HT29 | Capecitabine     | 3                                  | 3,366                                  | 1,393                                  |
| Tipifarnib-<br>Fulvestrant-VCaP | Fulvestrant      | 2                                  | 4,060                                  | 480                                    |
| Capecitabine-<br>Imatinib-A375  | Imatinib         | 7                                  | 16,493                                 | 1,015                                  |

<sup>a</sup> Drug A - Drug B - Cell line

<sup>b</sup> Filtered ChEMBL database contains more than 870,000 drugs.

<sup>c</sup> Drug combinations with Bliss synergy scores > 5 or < -5 were considered positive.
